# Supplementary material for: Ionothermal carbonization in [Bmim][FeCl4]: an opportunity for the valorization of raw lignocellulosic agrowastes into advanced porous carbons for CO2 capture
Source: Royal Society of Chemistry journal article supplement (doi:10.1039/d0gc01510e), 2020-01-01
Supplement: d0gc01510e1.pdf [file d0gc01510e1.pdf]

## Supporting Information

### **Ionothermal Carbonization in [Bmim][FeCl<sub>4</sub>]: an Opportunity for the Valorization of Raw Lignocellulosic Agrowastes into Advanced Porous Carbons for CO<sub>2</sub> Capture†**

Laure Cibien,<sup>‡,1</sup> Maxime Parot, <sup>‡,1</sup> Patrick Nkuigwe Fotsing,<sup>2</sup> Philippe Gaveau,<sup>1</sup> Emmanuel Djoufac Woumfo,<sup>2</sup> Julien Vieillard,<sup>3</sup> Alfredo Napoli,<sup>4</sup> Nicolas Brun\*,<sup>1</sup>

<sup>1</sup>ICGM, Univ Montpellier, CNRS, ENSCM, Montpellier (France)

<sup>2</sup>Laboratoire de Chimie Inorganique Appliquée, Département de Chimie Inorganique, Faculté des Sciences, Université de Yaoundé I, Yaoundé (Cameroun)

<sup>3</sup>Normandie Univ., UNIROUEN, INSA Rouen, CNRS, COBRA (UMR 6014), Rouen (France)

<sup>4</sup>CIRAD, UR BioWoob, Montpellier (France)

\*Email: [nicolas.brun@enscm.fr](mailto:nicolas.brun@enscm.fr)

†Electronic Supplementary Information (ESI) available: [Additional analytical data]. See DOI: 10.1039/x0xx00000x

‡These authors contributed equally to this work

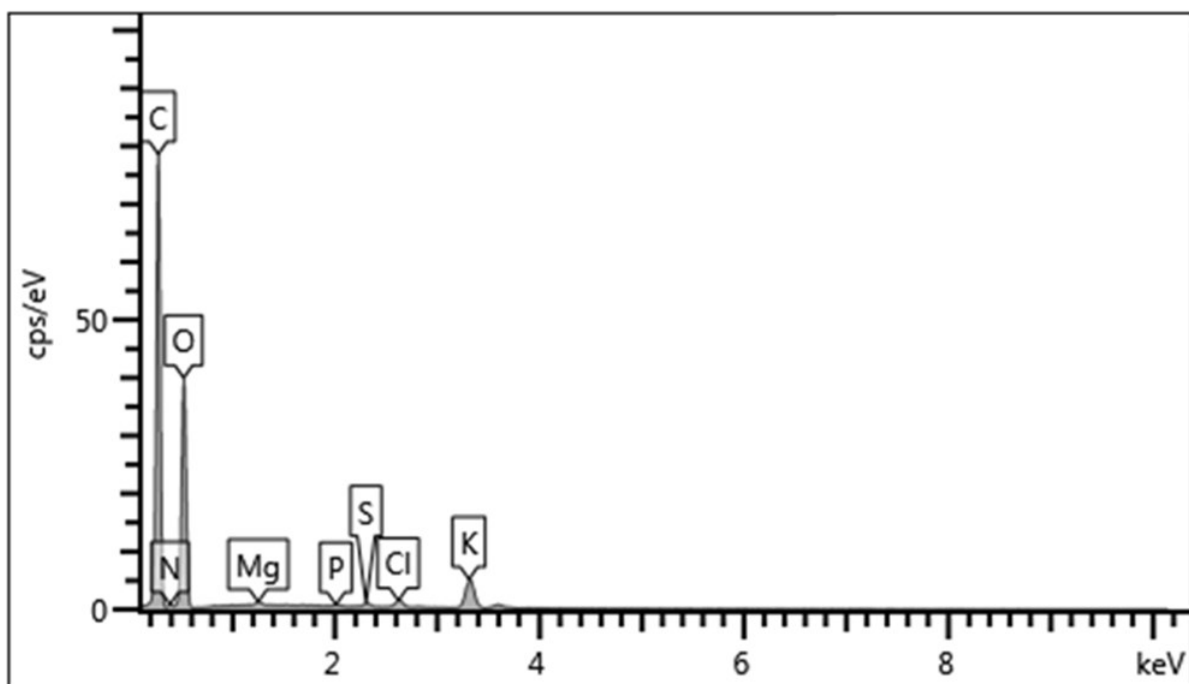

**Figure S1.** EDX spectrum of raw cocoa shell (CS).

**Table S1.** SEM-EDX analysis of raw cocoa shell (CS).

| Chemical element | wt.%   | at.%   |
|------------------|--------|--------|
| C                | 55.36  | 63.61  |
| N                | 1.52   | 1.49   |
| O                | 38.44  | 33.16  |
| Mg               | 0.21   | 0.12   |
| P                | 0.09   | 0.04   |
| S                | 0.22   | 0.10   |
| Cl               | 0.60   | 0.23   |
| K                | 3.56   | 1.25   |
| Total:           | 100.00 | 100.00 |

**Table S2.** Elemental and chemical composition of cocoa shell (CS).

|    | wt.% | TGA under air wt% |       | Elemental Analysis (EA) wt.% |                  |                   |                  | SEM-EDX wt%      |                  |
|----|------|-------------------|-------|------------------------------|------------------|-------------------|------------------|------------------|------------------|
|    |      | Lignin Klason     | Water | Ash                          | C                | H                 | O                | N                | K                |
| CS | 28.7 | 7.5               | 5.8   | 43.3 <sup>†</sup>            | 5.9 <sup>†</sup> | 46.5 <sup>†</sup> | 0.7 <sup>†</sup> | 3.7 <sup>†</sup> | 1.1 <sup>†</sup> |

<sup>†</sup>The total amount exceeds 100 wt% because SEM-EDX is not quantitative and overestimates some elements.

**Table S3.** Mass yield, carbon yield and elemental composition of hydrochars and ionochars obtained at 240°C.

|           | wt. %      |                      |              | Elemental Analysis (EA) wt. % |     |      |     | SEM-EDX wt% |     |
|-----------|------------|----------------------|--------------|-------------------------------|-----|------|-----|-------------|-----|
|           | Mass Yield | Corrected Mass Yield | Carbon Yield | C                             | H   | O    | N   | Fe          | Cl  |
| CS        | n/a        | n/a                  | n/a          | 43.3                          | 5.9 | 46.5 | 0.7 | 0           | 0   |
| HC-240    | 27         | 27                   | 45           | 70.9                          | 5.3 | 22.3 | 1.6 | 0           | 0   |
| HC-Fe-240 | 28         | 27.7                 | 46           | 71.8                          | 3.1 | 23.7 | 0.2 | 0           | 1.2 |
| IC-240    | 25         | 23.8                 | 39.5         | 71.6                          | n/a | n/a  | 6.7 | 0           | 0   |
| IC-Fe-240 | 47         | 43.4                 | 73           | 67.1                          | 3.8 | 26.8 | 1.4 | 3.5         | 4.3 |

†The total amount exceeds 100 wt% because SEM-EDX is not quantitative and overestimates some elements.

**Table S4.** Textural properties obtained from nitrogen sorption isotherms at 77 K of hydrochars and ionochars obtained at 240°C.

|           | Specific Surface Area (m <sup>2</sup> g <sup>-1</sup> ) |                          |                         | Volume (cm <sup>3</sup> g <sup>-1</sup> ) |                        |                       |
|-----------|---------------------------------------------------------|--------------------------|-------------------------|-------------------------------------------|------------------------|-----------------------|
|           | SSA <sub>BET</sub>                                      | SSA <sub>micropore</sub> | SSA <sub>external</sub> | V <sub>total</sub>                        | V <sub>micropore</sub> | V <sub>external</sub> |
| HC-240    | 20                                                      | 0                        | 20                      | 0.19                                      | 0                      | 0.19                  |
| HC-Fe-240 | 284                                                     | 156                      | 128                     | 0.6                                       | 0.06                   | 0.54                  |
| IC-240    | < 1                                                     | n/a                      | n/a                     | n/a                                       | n/a                    | n/a                   |
| IC-Fe-240 | 550                                                     | 438                      | 112                     | 0.46                                      | 0.2                    | 0.26                  |

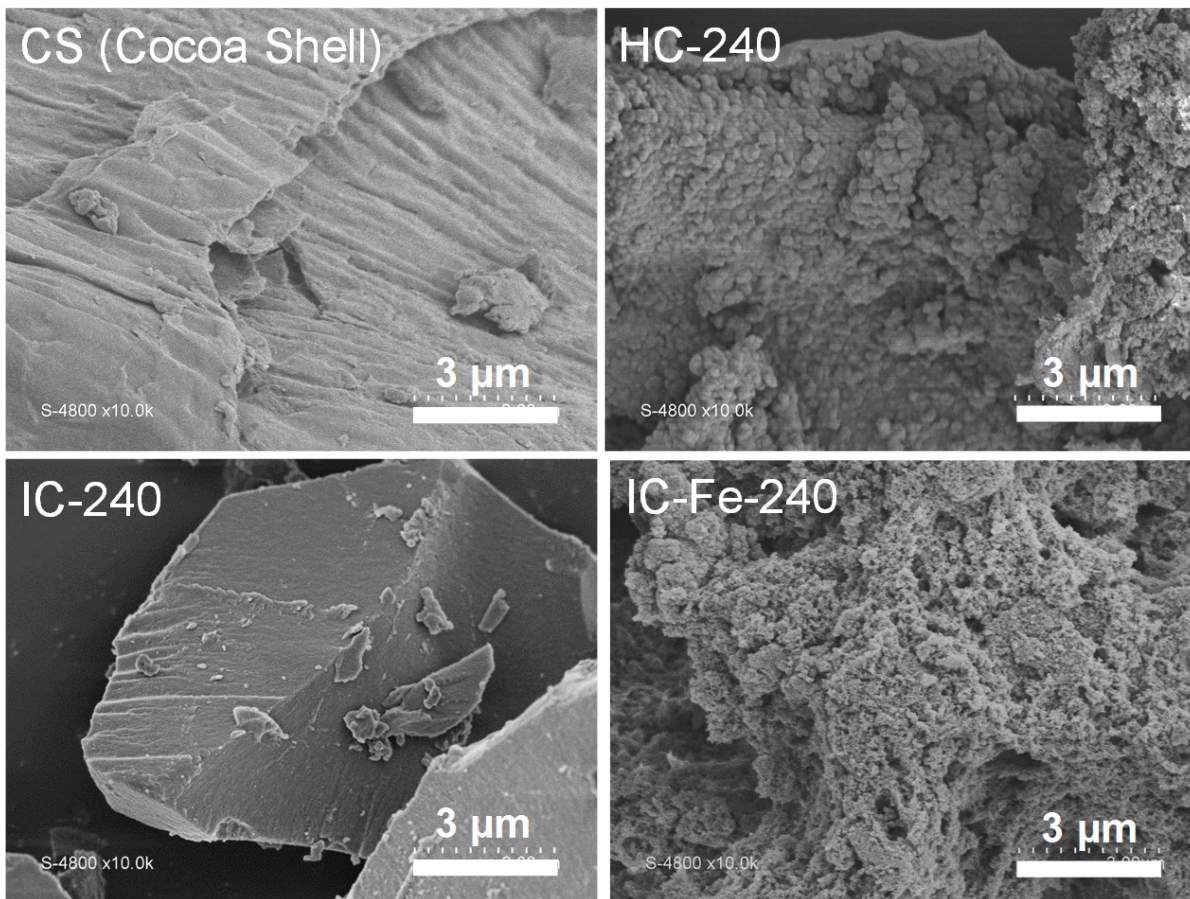

**Figure S2.** Scanning electron microscopy of raw cocoa shell (CS) and CS-derived hydrochar (HC-240) and ionochars (IC-240 and IC-Fe-240) obtained at 240°C.

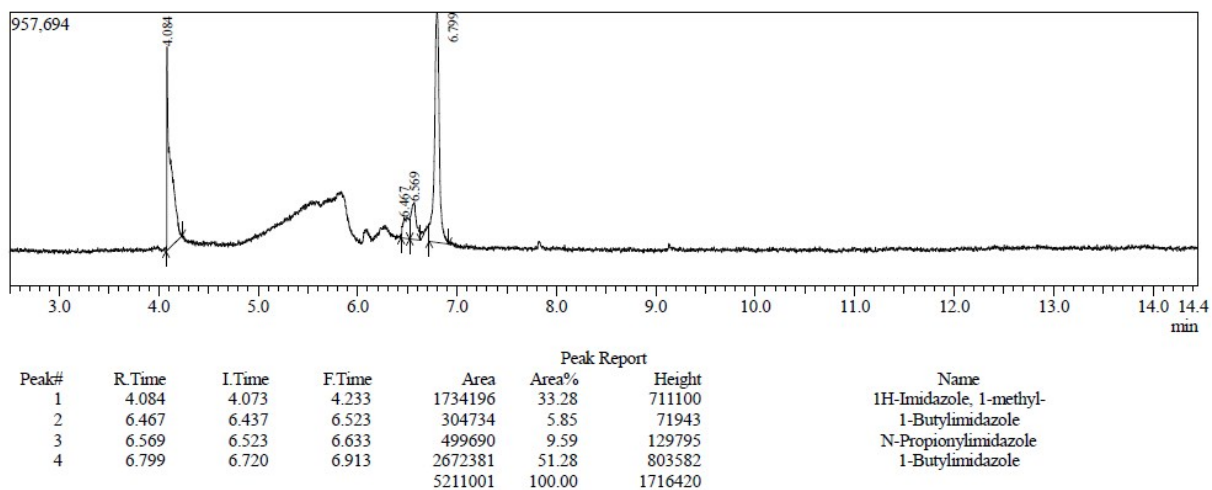

**Figure S3.** GC-MS of [Bmim]Cl recovered after ITC of CS at 240°C for 20 h.

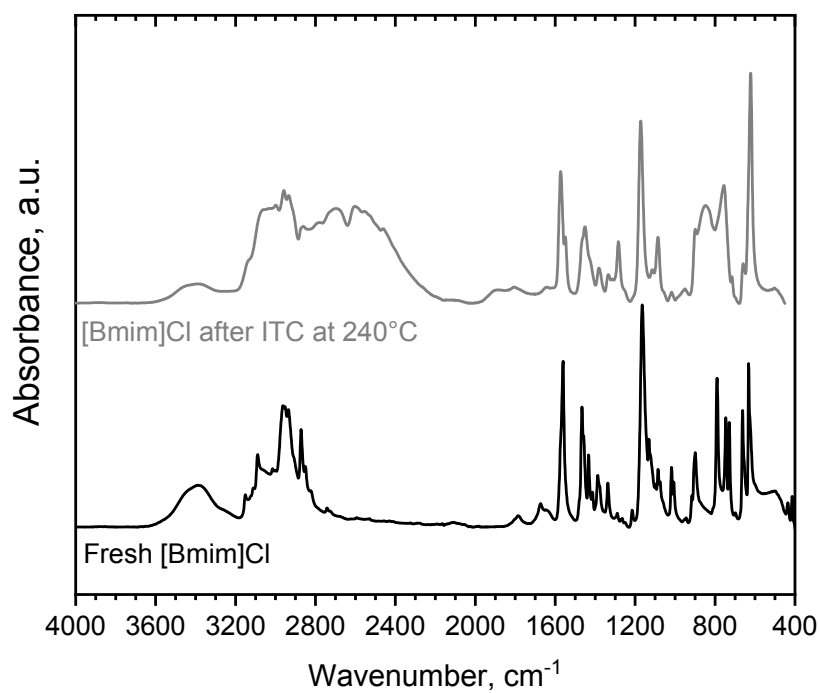

**Figure S4.** FTIR spectra of fresh [Bmim]Cl and [Bmim]Cl recovered after ITC of CS at 240°C for 20 h.

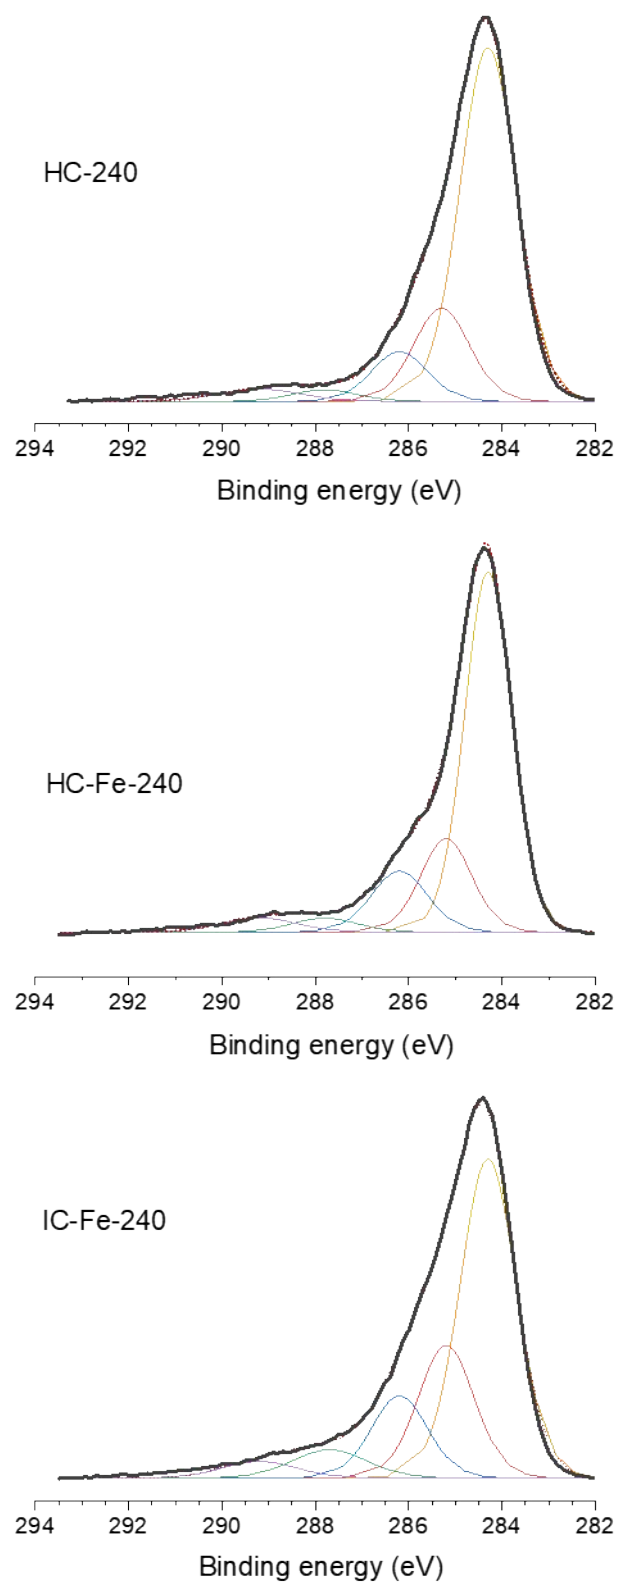

**Figure S5.** C1s X-ray photoelectron spectroscopy band-like spectra (black solid lines) and deconvoluted curves (colored solid lines) of **HC-240**, **HC-Fe-240** and **IC-Fe-240**.

**Table S5.** XPS data obtained from the deconvoluted C1s spectra of hydrochars and ionochars obtained at 240°C.

|               | XPS at. % |       |       |       |       |     |
|---------------|-----------|-------|-------|-------|-------|-----|
| Position (eV) | 284.3     | 285.2 | 286.2 | 287.7 | 289.2 | 711 |
| Function      | Csp2      | Csp3  | C-O   | C=O   | COOR  | Fe  |
| IC-Fe-240     | 53.7      | 22.3  | 13.9  | 6.4   | 3.8   | 0.7 |
| HC-240        | 67        | 17.5  | 9.4   | 2.6   | 3.5   | n/a |
| HC-Fe-240     | 62.2      | 17.7  | 12.7  | 3.4   | 4.0   | n/a |

**Table S6.** XPS data obtained from the deconvoluted O1s spectra of hydrochars and ionochars obtained at 240°C.

|               | XPS at. %           |       |                          | O/C mass ratio |      |
|---------------|---------------------|-------|--------------------------|----------------|------|
|               |                     |       |                          | XPS            | EA   |
| Position (eV) | 531.4               | 533.0 | 534.5                    | n/a            | n/a  |
| Function      | C-O-C and/or Fe-O-C | C=O   | Strong electronegativity | n/a            | n/a  |
| IC-Fe-240     | 35                  | 58    | 7                        | 0.27           | 0.40 |
| HC-240        | 29                  | 71    | 0                        | 0.26           | 0.31 |
| HC-Fe-240     | 29                  | 69    | 2                        | 0.28           | 0.33 |

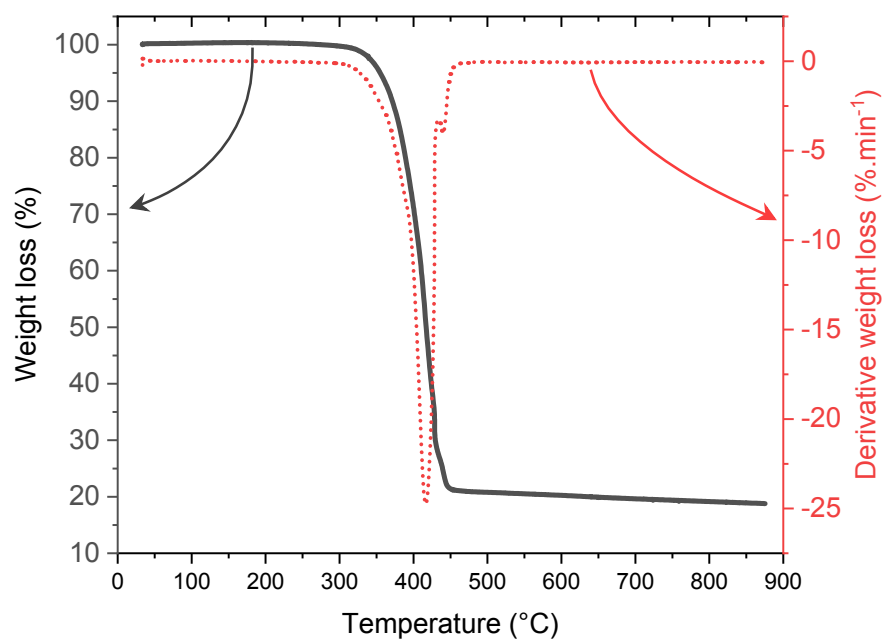

**Figure S6.** TGA of [Bmim][FeCl<sub>4</sub>] under air at 10 °C min<sup>-1</sup>.

**Table S7. Water content.** Mass yield, carbon yield and elemental composition of hydrochars and ionochars obtained at 240°C.

|               | wt. %      |                      |              | Elemental Analysis (EA)<br>wt. % |     |     | SEM-EDX wt% |     |
|---------------|------------|----------------------|--------------|----------------------------------|-----|-----|-------------|-----|
|               | Mass Yield | Corrected Mass Yield | Carbon Yield | C                                | H   | N   | Fe          | Cl  |
| HC-240        | 27         | 27                   | 45           | 70.9                             | 5.3 | 1.6 | 0           | 0   |
| IC-Fe-240-25w | 41         | 38.4                 | 61.6         | 69                               | 3.9 | 0.6 | 5.4         | 1   |
| IC-Fe-240-10w | 43         | 40.4                 | 68.8         | 68.8                             | 3.4 | 1   | 2.9         | 3.2 |
| IC-Fe-240-2w  | 47         | 43.5                 | 74.8         | 67.7                             | 3.4 | 1.3 | 2.8         | 4.6 |
| IC-Fe-240     | 47         | 43.4                 | 73           | 67.1                             | 3.8 | 1.4 | 3.5         | 4.3 |

**Table S8. Water content.** Textural properties obtained from nitrogen sorption isotherms at 77 K of ionochars obtained at 240°C.

|               | Specific Surface Area (m <sup>2</sup> g <sup>-1</sup> ) |                          |                         | Volume (cm <sup>3</sup> g <sup>-1</sup> ) |                        |                       |
|---------------|---------------------------------------------------------|--------------------------|-------------------------|-------------------------------------------|------------------------|-----------------------|
|               | SSA <sub>BET</sub>                                      | SSA <sub>micropore</sub> | SSA <sub>external</sub> | V <sub>total</sub>                        | V <sub>micropore</sub> | V <sub>external</sub> |
| HC-240        | 20                                                      | 0                        | 20                      | 0.19                                      | 0                      | 0.19                  |
| IC-Fe-240-25w | 474                                                     | 395                      | 79                      | 0.37                                      | 0.17                   | 0.2                   |
| IC-Fe-240-10w | 616                                                     | 476                      | 140                     | 0.57                                      | 0.21                   | 0.36                  |
| IC-Fe-240-2w  | 566                                                     | 434                      | 132                     | 0.52                                      | 0.19                   | 0.33                  |
| IC-Fe-240     | 550                                                     | 438                      | 112                     | 0.46                                      | 0.2                    | 0.26                  |

**Table S9. Biomass composition.** Mass yield, carbon yield and elemental composition of ionochars obtained at 240°C from cellulose (C), cocoa shell, klason lignin (KL) and commercial kraft lignin (L).

|              | wt. %      |                      |              | Elemental Analysis (EA)<br>wt. % |     |     | SEM-EDX wt% |     |
|--------------|------------|----------------------|--------------|----------------------------------|-----|-----|-------------|-----|
|              | Mass Yield | Corrected Mass Yield | Carbon Yield | C                                | H   | N   | Fe          | Cl  |
| IC-Fe-240-C  | 47         | 44                   | 79.3         | 70.7                             | 3.5 | 0.3 | 2.3         | 4.1 |
| IC-Fe-240    | 47         | 43.4                 | 73           | 67.1                             | 3.8 | 1.4 | 3.5         | 4.3 |
| IC-Fe-240-KL | 83         | 75.5                 | 91.3         | 65.1                             | 3.8 | 1.7 | 2.8         | 6.2 |
| IC-Fe-240-L  | 96         | 85.6                 | 92.3         | 59.7                             | 2.4 | 0.7 | 6.1         | 4.7 |

**Table S10. Biomass composition.** Textural properties obtained from nitrogen sorption isotherms at 77 K of ionochars obtained at 240°C from cellulose (C), cocoa shell, klason lignin (KL) and commercial kraft lignin (L).

|              | Specific Surface Area (m <sup>2</sup> g <sup>-1</sup> ) |                          |                         | Volume (cm <sup>3</sup> g <sup>-1</sup> ) |                        |                       |
|--------------|---------------------------------------------------------|--------------------------|-------------------------|-------------------------------------------|------------------------|-----------------------|
|              | SSA <sub>BET</sub>                                      | SSA <sub>micropore</sub> | SSA <sub>external</sub> | V <sub>total</sub>                        | V <sub>micropore</sub> | V <sub>external</sub> |
| IC-Fe-240-C  | 736                                                     | 688                      | 48                      | 0.61                                      | 0.34                   | 0.27                  |
| IC-Fe-240    | 550                                                     | 438                      | 112                     | 0.46                                      | 0.2                    | 0.26                  |
| IC-Fe-240-KL | 250                                                     | 216                      | 34                      | 0.17                                      | 0.09                   | 0.08                  |
| IC-Fe-240-L  | 42                                                      | 14                       | 28                      | 0.15                                      | 0                      | 0.15                  |



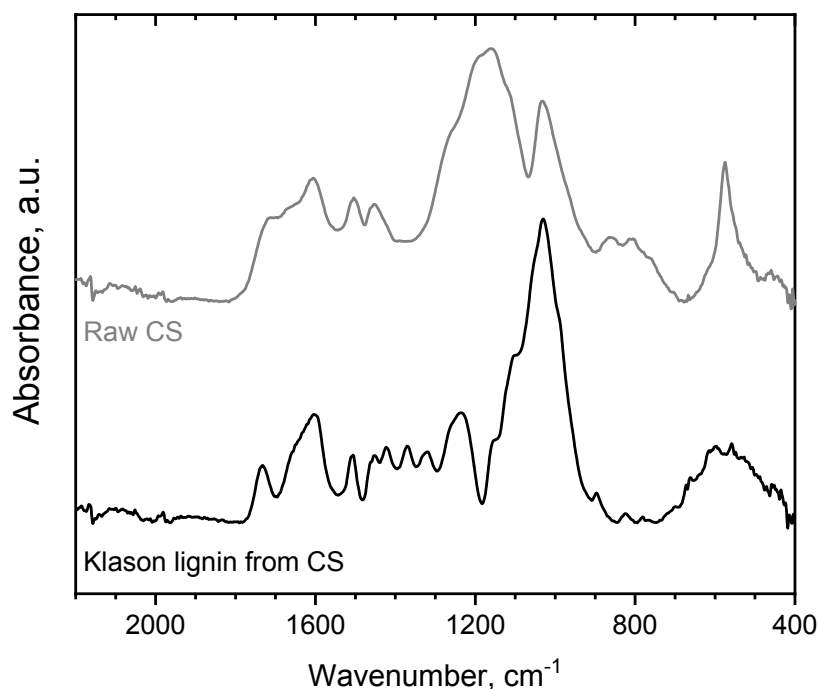

**Figure S7.** FTIR spectra of raw CS and Klason lignin.

**Table S11. Recycling.** Mass yield, carbon yield and elemental composition of ionochars obtained at 240°C from fresh BmimFeCl<sub>4</sub> (**IC-Fe-240**) and from recycled BmimFeCl<sub>4</sub> (**IC-Fe-240-r1**).

|              | wt. %      |                      |              | Elemental Analysis (EA)<br>wt. % |     |     | SEM-EDX wt% |     |
|--------------|------------|----------------------|--------------|----------------------------------|-----|-----|-------------|-----|
|              | Mass Yield | Corrected Mass Yield | Carbon Yield | C                                | H   | N   | Fe          | Cl  |
| IC-Fe-240    | 47         | 43.4                 | 73           | 67.1                             | 3.8 | 1.4 | 3.5         | 4.3 |
| IC-Fe-240-r1 | 45.4       | 42.4                 | 72.6         | 68.7                             | 3.3 | 1.5 | 3.4         | 3.3 |

**Table S12. Recycling.** Textural properties obtained from nitrogen sorption isotherms at 77 K of ionochars obtained at 240°C from fresh BmimFeCl<sub>4</sub> (**IC-Fe-240**) and from recycled BmimFeCl<sub>4</sub> (**IC-Fe-240-r1**).

|              | Specific Surface Area (m <sup>2</sup> g <sup>-1</sup> ) |                          |                         | Volume (cm <sup>3</sup> g <sup>-1</sup> ) |                        |                       |
|--------------|---------------------------------------------------------|--------------------------|-------------------------|-------------------------------------------|------------------------|-----------------------|
|              | SSA <sub>BET</sub>                                      | SSA <sub>micropore</sub> | SSA <sub>external</sub> | V <sub>total</sub>                        | V <sub>micropore</sub> | V <sub>external</sub> |
| IC-Fe-240    | 550                                                     | 438                      | 112                     | 0.46                                      | 0.2                    | 0.26                  |
| IC-Fe-240-r1 | 455                                                     | 354                      | 101                     | 0.4                                       | 0.15                   | 0.25                  |

**Table S13. Pyrolysis.** Textural properties obtained from nitrogen sorption isotherms at 77 K of ionochars obtained at 240°C and pyrolyzed at 900°C under argon (P9).

|                  | Specific Surface Area (m <sup>2</sup> g <sup>-1</sup> ) |                          |                         | Volume (cm <sup>3</sup> g <sup>-1</sup> ) |                        |                       |
|------------------|---------------------------------------------------------|--------------------------|-------------------------|-------------------------------------------|------------------------|-----------------------|
|                  | SSA <sub>BET</sub>                                      | SSA <sub>micropore</sub> | SSA <sub>external</sub> | V <sub>total</sub>                        | V <sub>micropore</sub> | V <sub>external</sub> |
| IC-Fe-240        | 550                                                     | 438                      | 112                     | 0.46                                      | 0.2                    | 0.26                  |
| IC-Fe-240-P9     | 552                                                     | 479                      | 73                      | 0.35                                      | 0.2                    | 0.15                  |
| IC-Fe-240-10w-P9 | 640                                                     | 497                      | 143                     | 0.62                                      | 0.2                    | 0.42                  |
| HC-240-P9        | 249                                                     | 215                      | 34                      | 0.25                                      | 0.09                   | 0.16                  |
| HC-Fe-240-P9     | 530                                                     | 407                      | 123                     | 0.61                                      | 0.16                   | 0.45                  |
| CS-P9            | < 1                                                     | n/a                      | n/a                     | n/a                                       | n/a                    | n/a                   |

**Table S14. Pyrolysis.** Mass yield, carbon yield and elemental composition of ionochars obtained at 240°C and pyrolyzed at 900°C under argon (P9).

|                  | wt. %      |                      |              | Elemental Analysis (EA)<br>wt. % |     |     | SEM-EDX<br>wt% |     |
|------------------|------------|----------------------|--------------|----------------------------------|-----|-----|----------------|-----|
|                  | Mass Yield | Corrected Mass Yield | Carbon Yield | C                                | H   | N   | Fe             | Cl  |
| IC-Fe-240        | 47         | 43.4                 | 73           | 67.1                             | 3.8 | 1.4 | 3.5            | 4.3 |
| IC-Fe-240-P9     | 63         | n/a                  | 83.9         | 89.4                             | 0.6 | 1.5 | 1.8            | 0   |
| IC-Fe-240-10w-P9 | 66         | n/a                  | 78.1         | 81.4                             | 1.6 | 0.8 | 1.9            | 0   |
| HC-240-P9        | 56         | n/a                  | 69.9         | 88.5                             | 0.6 | 1.6 | n/a            | n/a |
| HC-Fe-240-P9     | 63         | n/a                  | 81.2         | 92.5                             | 0.2 | 0.2 | 0.5            | 0   |
| CS-P9            | 30         | n/a                  | 48.4         | 69.8                             | 1.3 | 0.9 | n/a            | n/a |

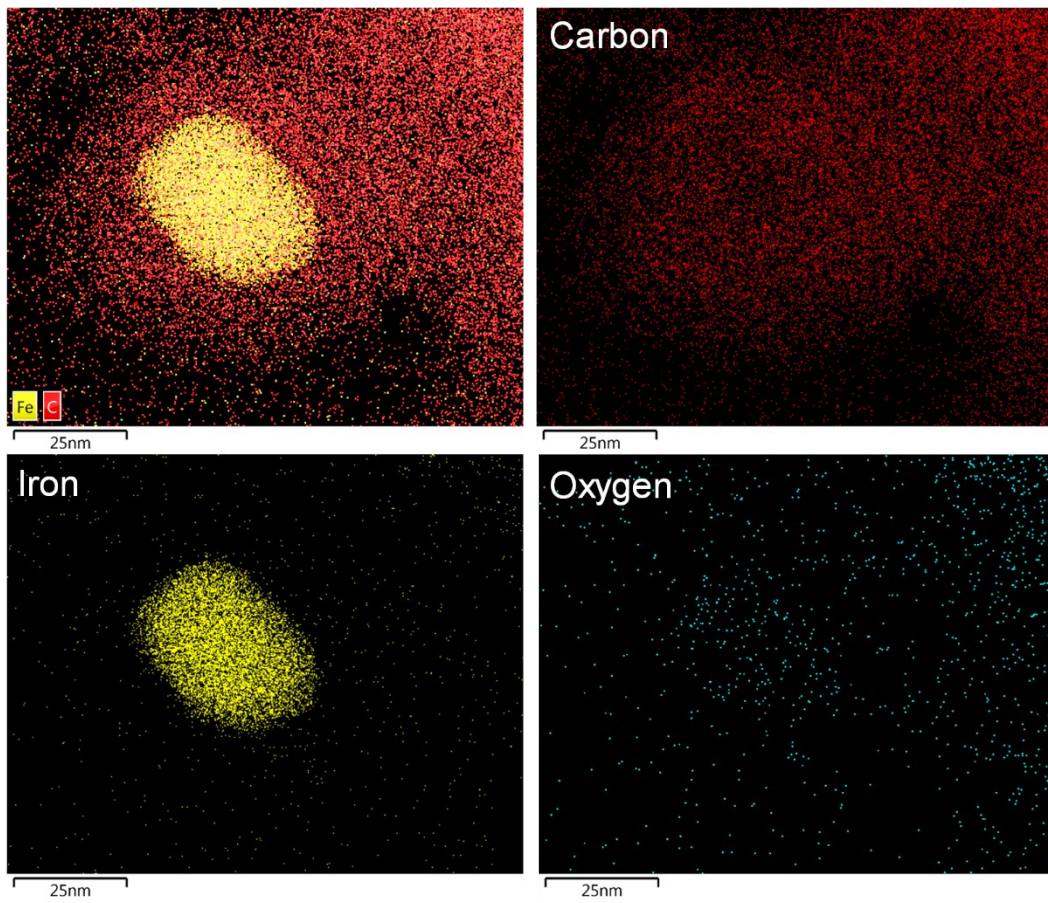

**Figure S8.** STEM EDX mapping of IC-Fe-240-P9.

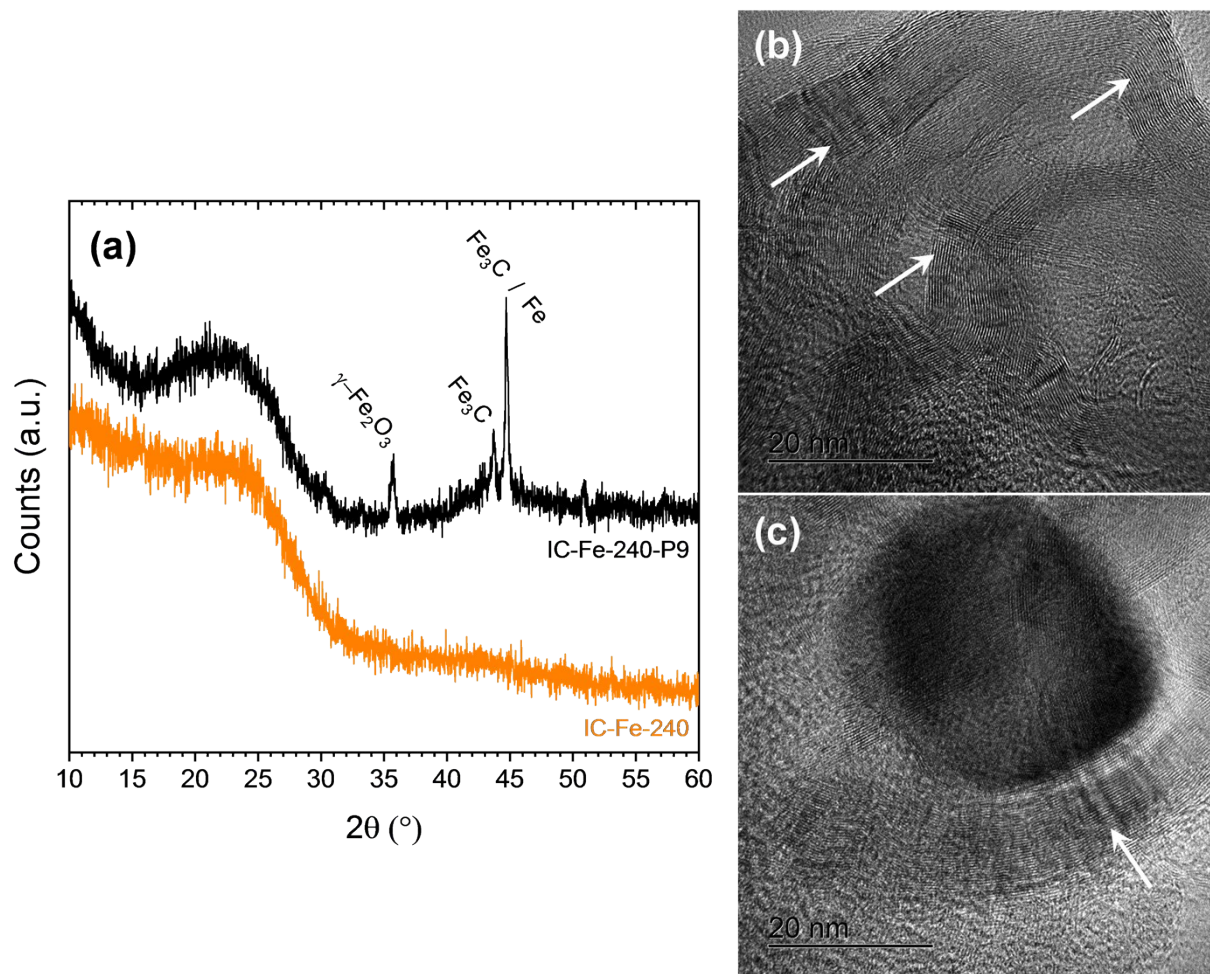

**Figure S9.** (a) XRD patterns of IC-Fe-240 and IC-Fe-240-P9. (b-c) HR-TEM of IC-Fe-240-P9. The white arrows indicate the graphitic layers.

**Table S15. CO<sub>2</sub> activation.** Textural properties obtained from nitrogen sorption isotherms at 77 K of ionochars obtained at 240°C and pyrolyzed at 900°C under argon (**P9**) or activated at 950°C under CO<sub>2</sub> (**A1**, **A2**).

|                  | Specific Surface Area (m <sup>2</sup> g <sup>-1</sup> ) |                          |                         | Volume (cm <sup>3</sup> g <sup>-1</sup> ) |                        |                       |
|------------------|---------------------------------------------------------|--------------------------|-------------------------|-------------------------------------------|------------------------|-----------------------|
|                  | SSA <sub>BET</sub>                                      | SSA <sub>micropore</sub> | SSA <sub>external</sub> | V <sub>total</sub>                        | V <sub>micropore</sub> | V <sub>external</sub> |
| IC-Fe-240-10w    | 616                                                     | 476                      | 140                     | 0.57                                      | 0.21                   | 0.36                  |
| IC-Fe-240-10w-P9 | 640                                                     | 497                      | 143                     | 0.62                                      | 0.2                    | 0.42                  |
| IC-Fe-240-10w-A1 | 1441                                                    | 1214                     | 227                     | 1.19                                      | 0.5                    | 0.69                  |
| IC-Fe-240-10w-A2 | 2065                                                    | 1778                     | 287                     | 1.59                                      | 0.73                   | 0.86                  |
| HC-240-A1        | 807                                                     | 784                      | 23                      | 0.47                                      | 0.31                   | 0.16                  |

**Table S16. CO<sub>2</sub> activation.** Mass yield, carbon yield and elemental composition of ionochars obtained at 240°C and pyrolyzed at 900°C under argon (**P9**) or activated at 950°C under CO<sub>2</sub> (**A1**, **A2**).

|                  | wt. %      |                      |              | Elemental Analysis (EA)<br>wt. % |     |     | SEM-EDX wt% |     |
|------------------|------------|----------------------|--------------|----------------------------------|-----|-----|-------------|-----|
|                  | Mass Yield | Corrected Mass Yield | Carbon Yield | C                                | H   | N   | Fe          | Cl  |
| IC-Fe-240-10w    | 43         | 40.4                 | 68.8         | 68.8                             | 3.4 | 1   | 2.9         | 3.2 |
| IC-Fe-240-10w-P9 | 66         | n/a                  | 78.1         | 81.4                             | 1.6 | 0.8 | 1.9         | 0   |
| IC-Fe-240-10w-A1 | 37         | n/a                  | 39.5         | 73.5                             | 1.9 | 0.4 | 1.4         | 0   |
| IC-Fe-240-10w-A2 | 35         | n/a                  | 35.5         | 69.8                             | 2.1 | 0.4 | 3.3         | 0   |
| HC-240-A1        | 44         | n/a                  | 44.8         | 72.2                             | 2.2 | 1.6 | n/a         | n/a |

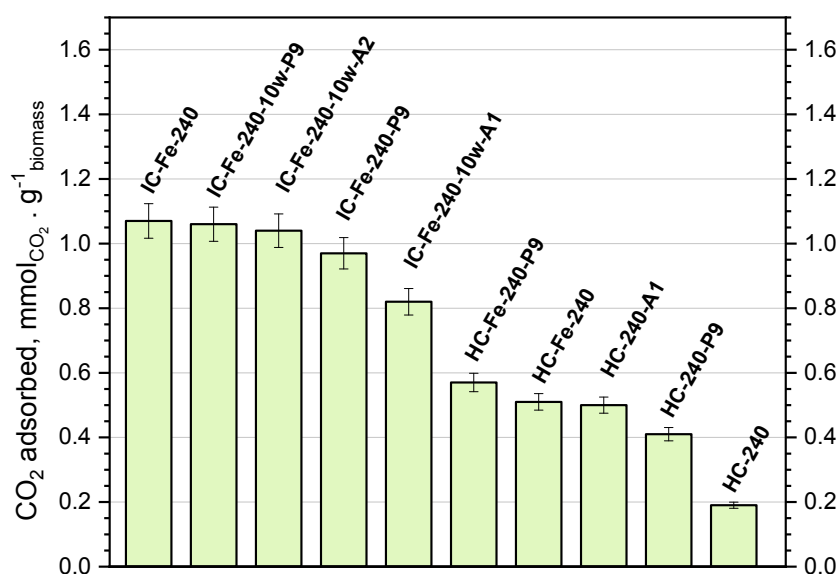

**Figure S10.** CO<sub>2</sub> uptake at 273 K of each sample expressed per gram of CS treated.
